# Supplementary material for: Vedolizumab and Anti-Tumour Necrosis Factor α Real-World Outcomes in Biologic-Naïve Inflammatory Bowel Disease Patients: Results from the EVOLVE Study
Source: PubMed Central journal article supplement — J Crohns Colitis. 2021 Mar 30;15(10):1694–706. doi: 10.1093/ecco-jcc/jjab058 (PMC8495488; doi:10.1093/ecco-jcc/jjab058), 2021-03-30
Supplement: jjab058_suppl_supplementary_figure_13.pdf [file jjab058_suppl_supplementary_figure_13.pdf]

Supplemental Figure 13. Unadjusted Cumulative Rates of Treatment Persistence, Clinical Remission and Mucosal Healing in Biologic-naïve Ulcerative Colitis Patients Treated with Vedolizumab or Anti-TNF $\alpha$  Therapy

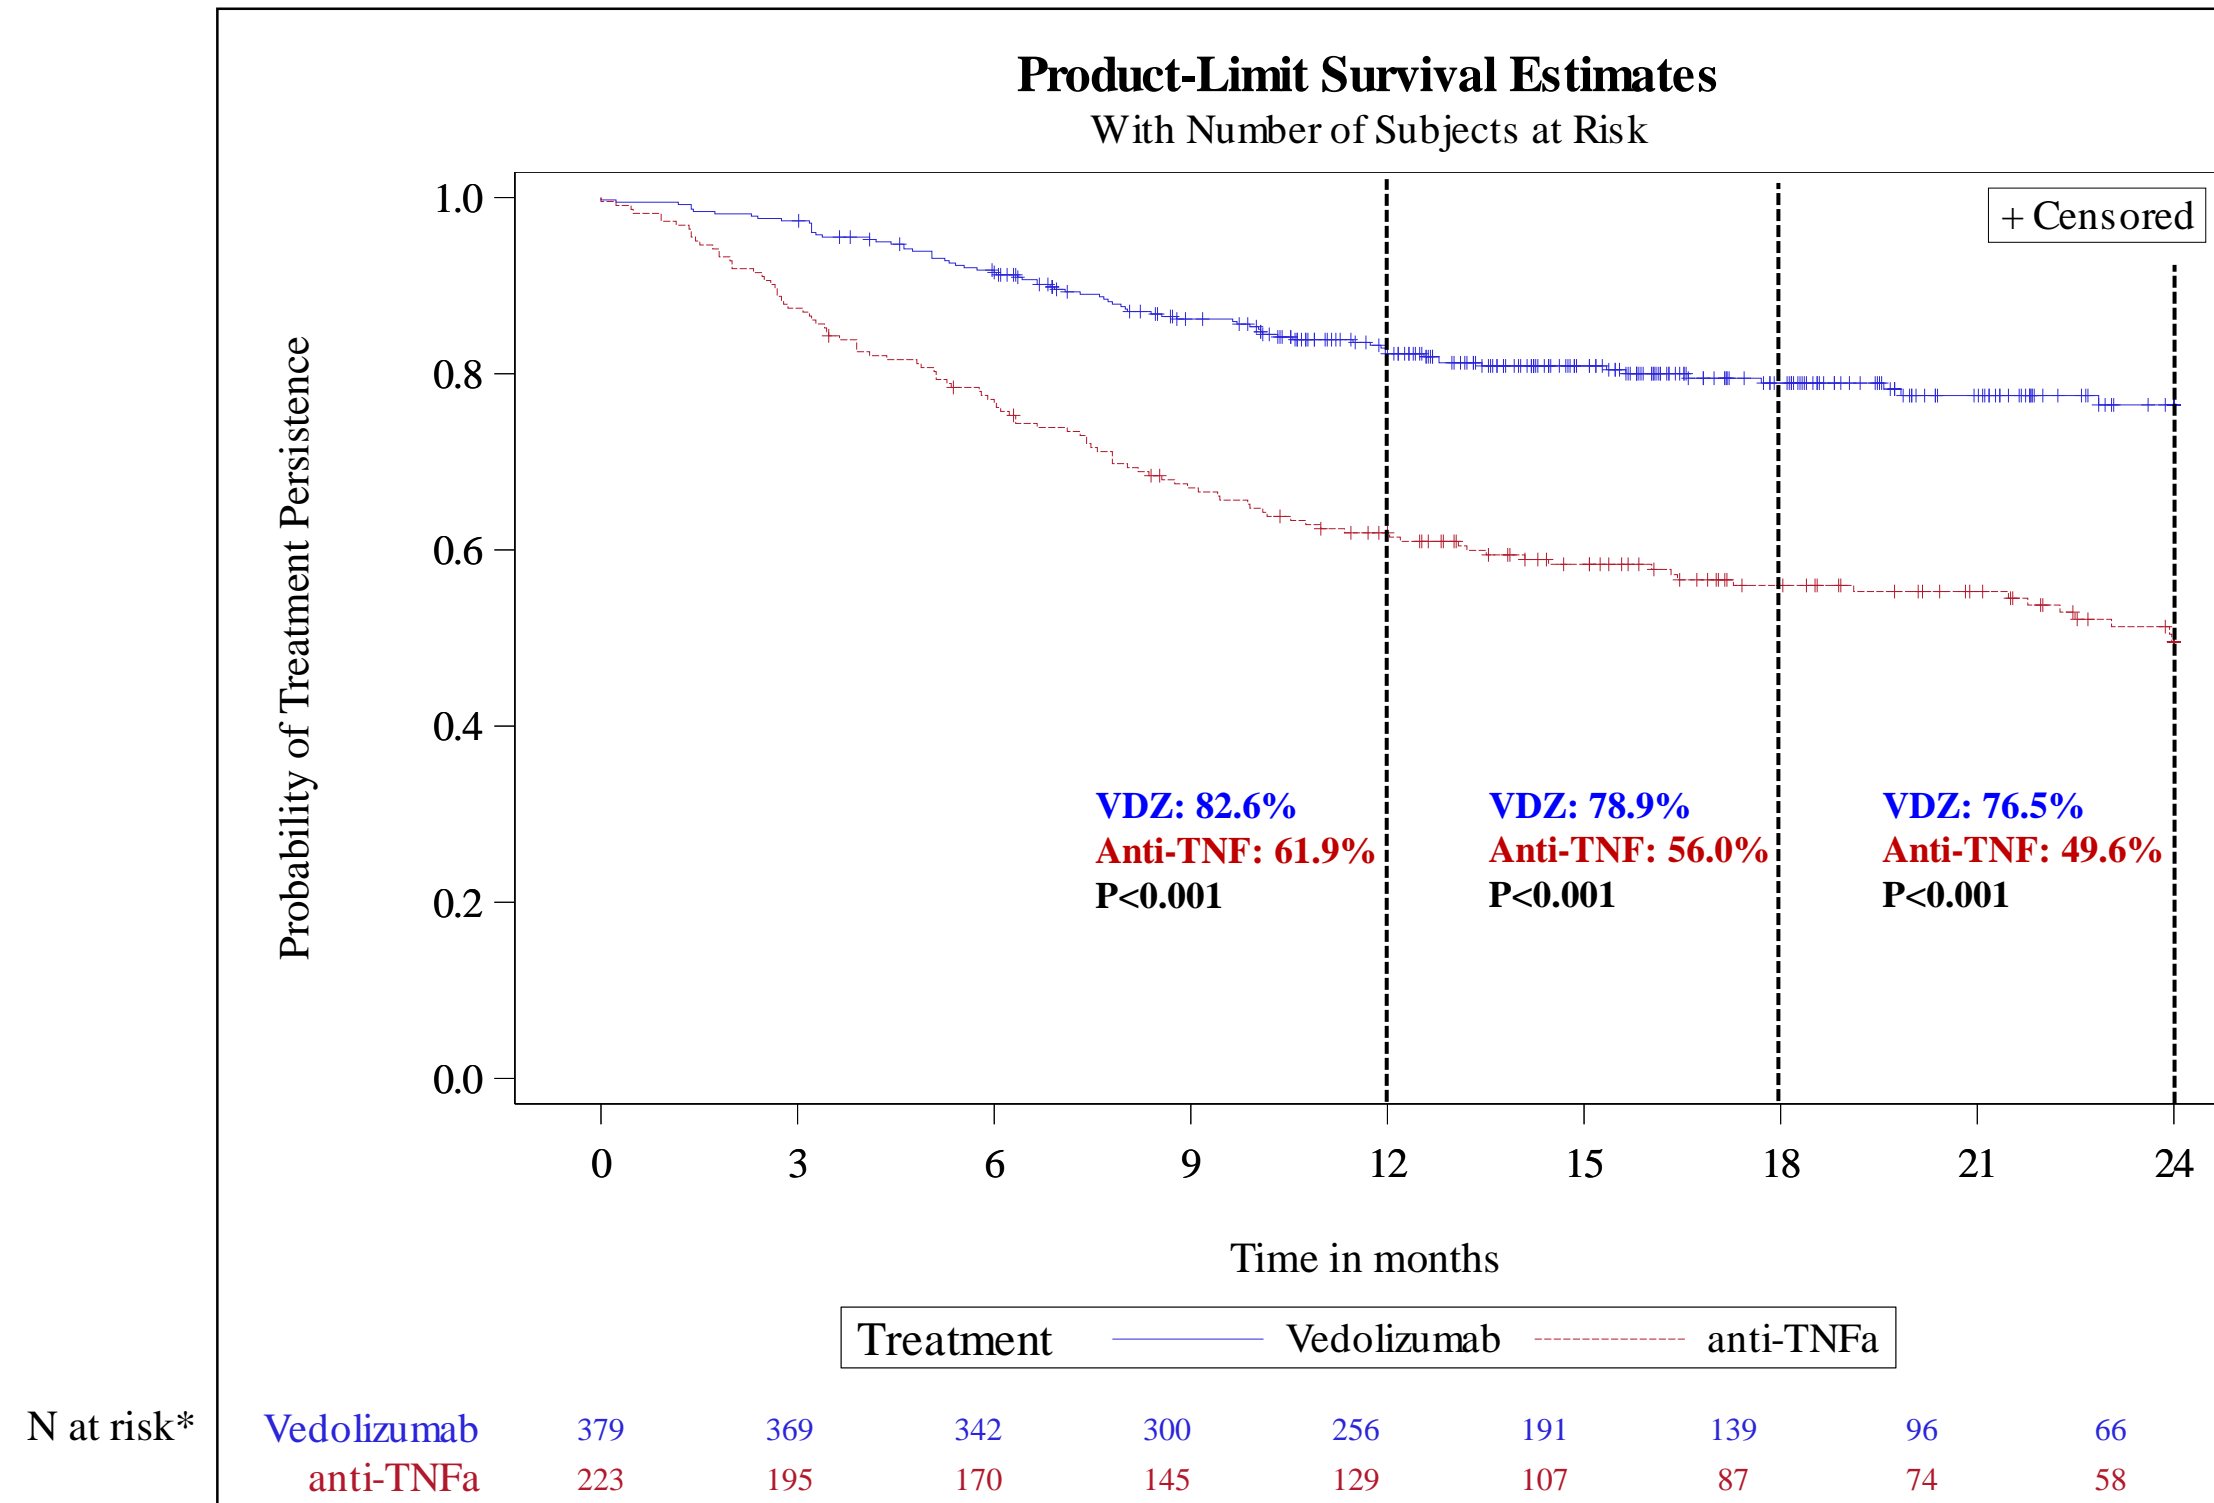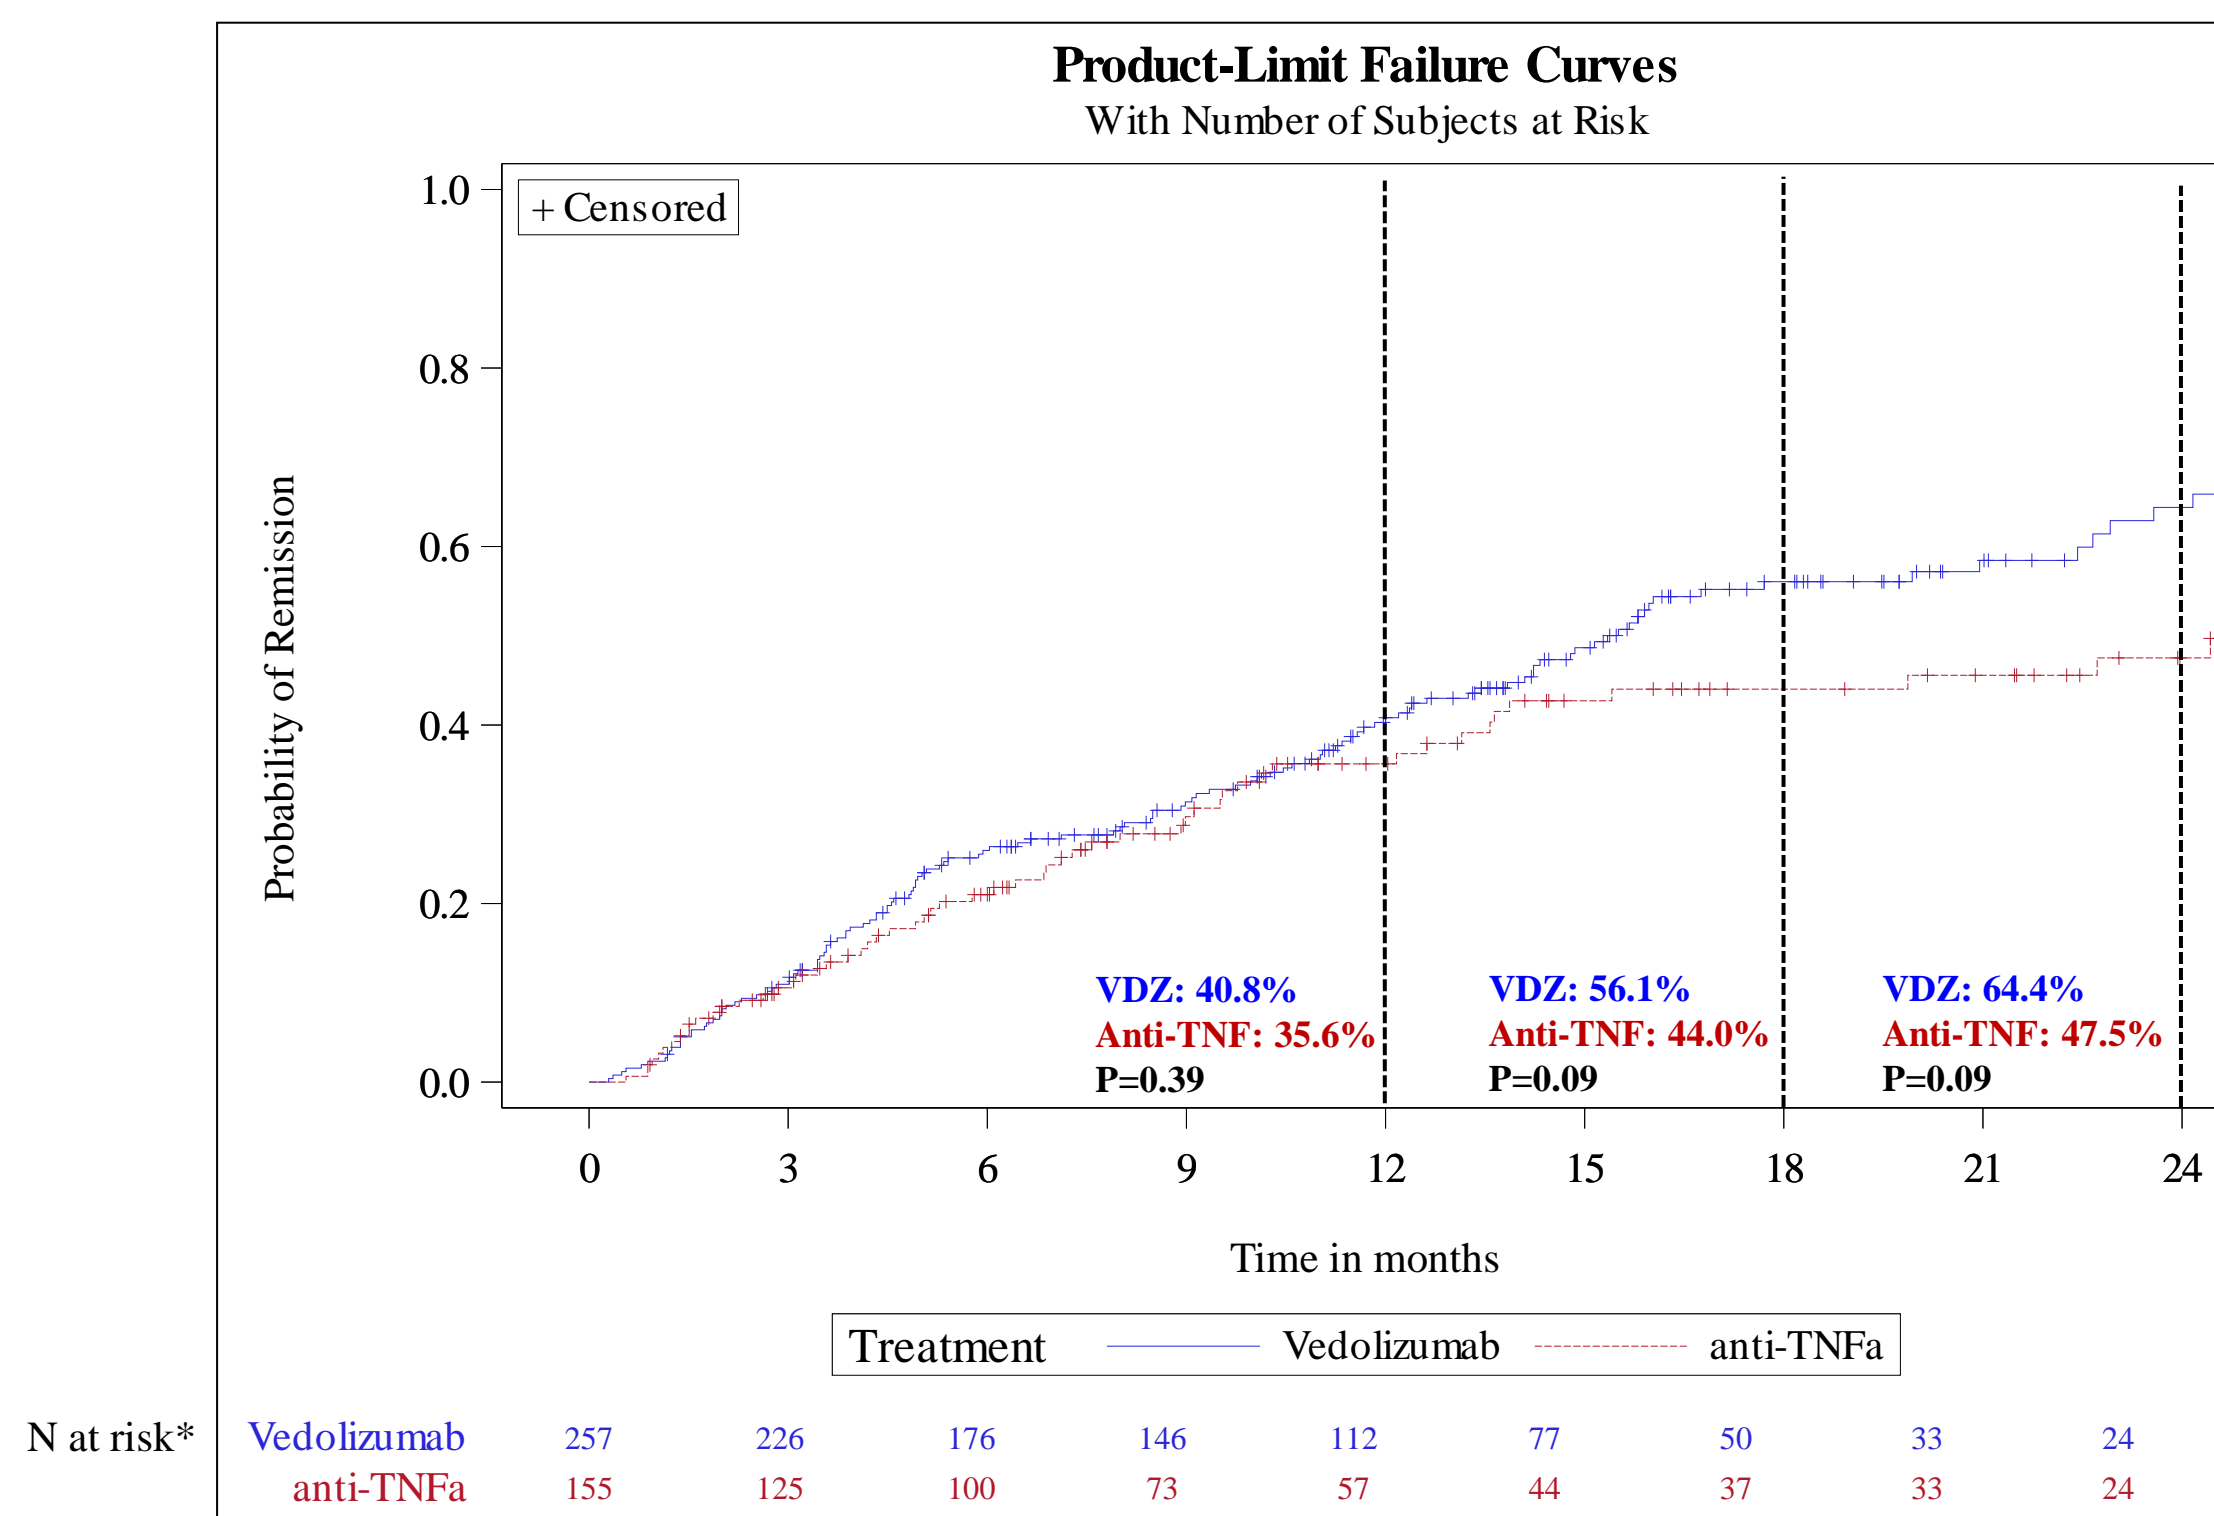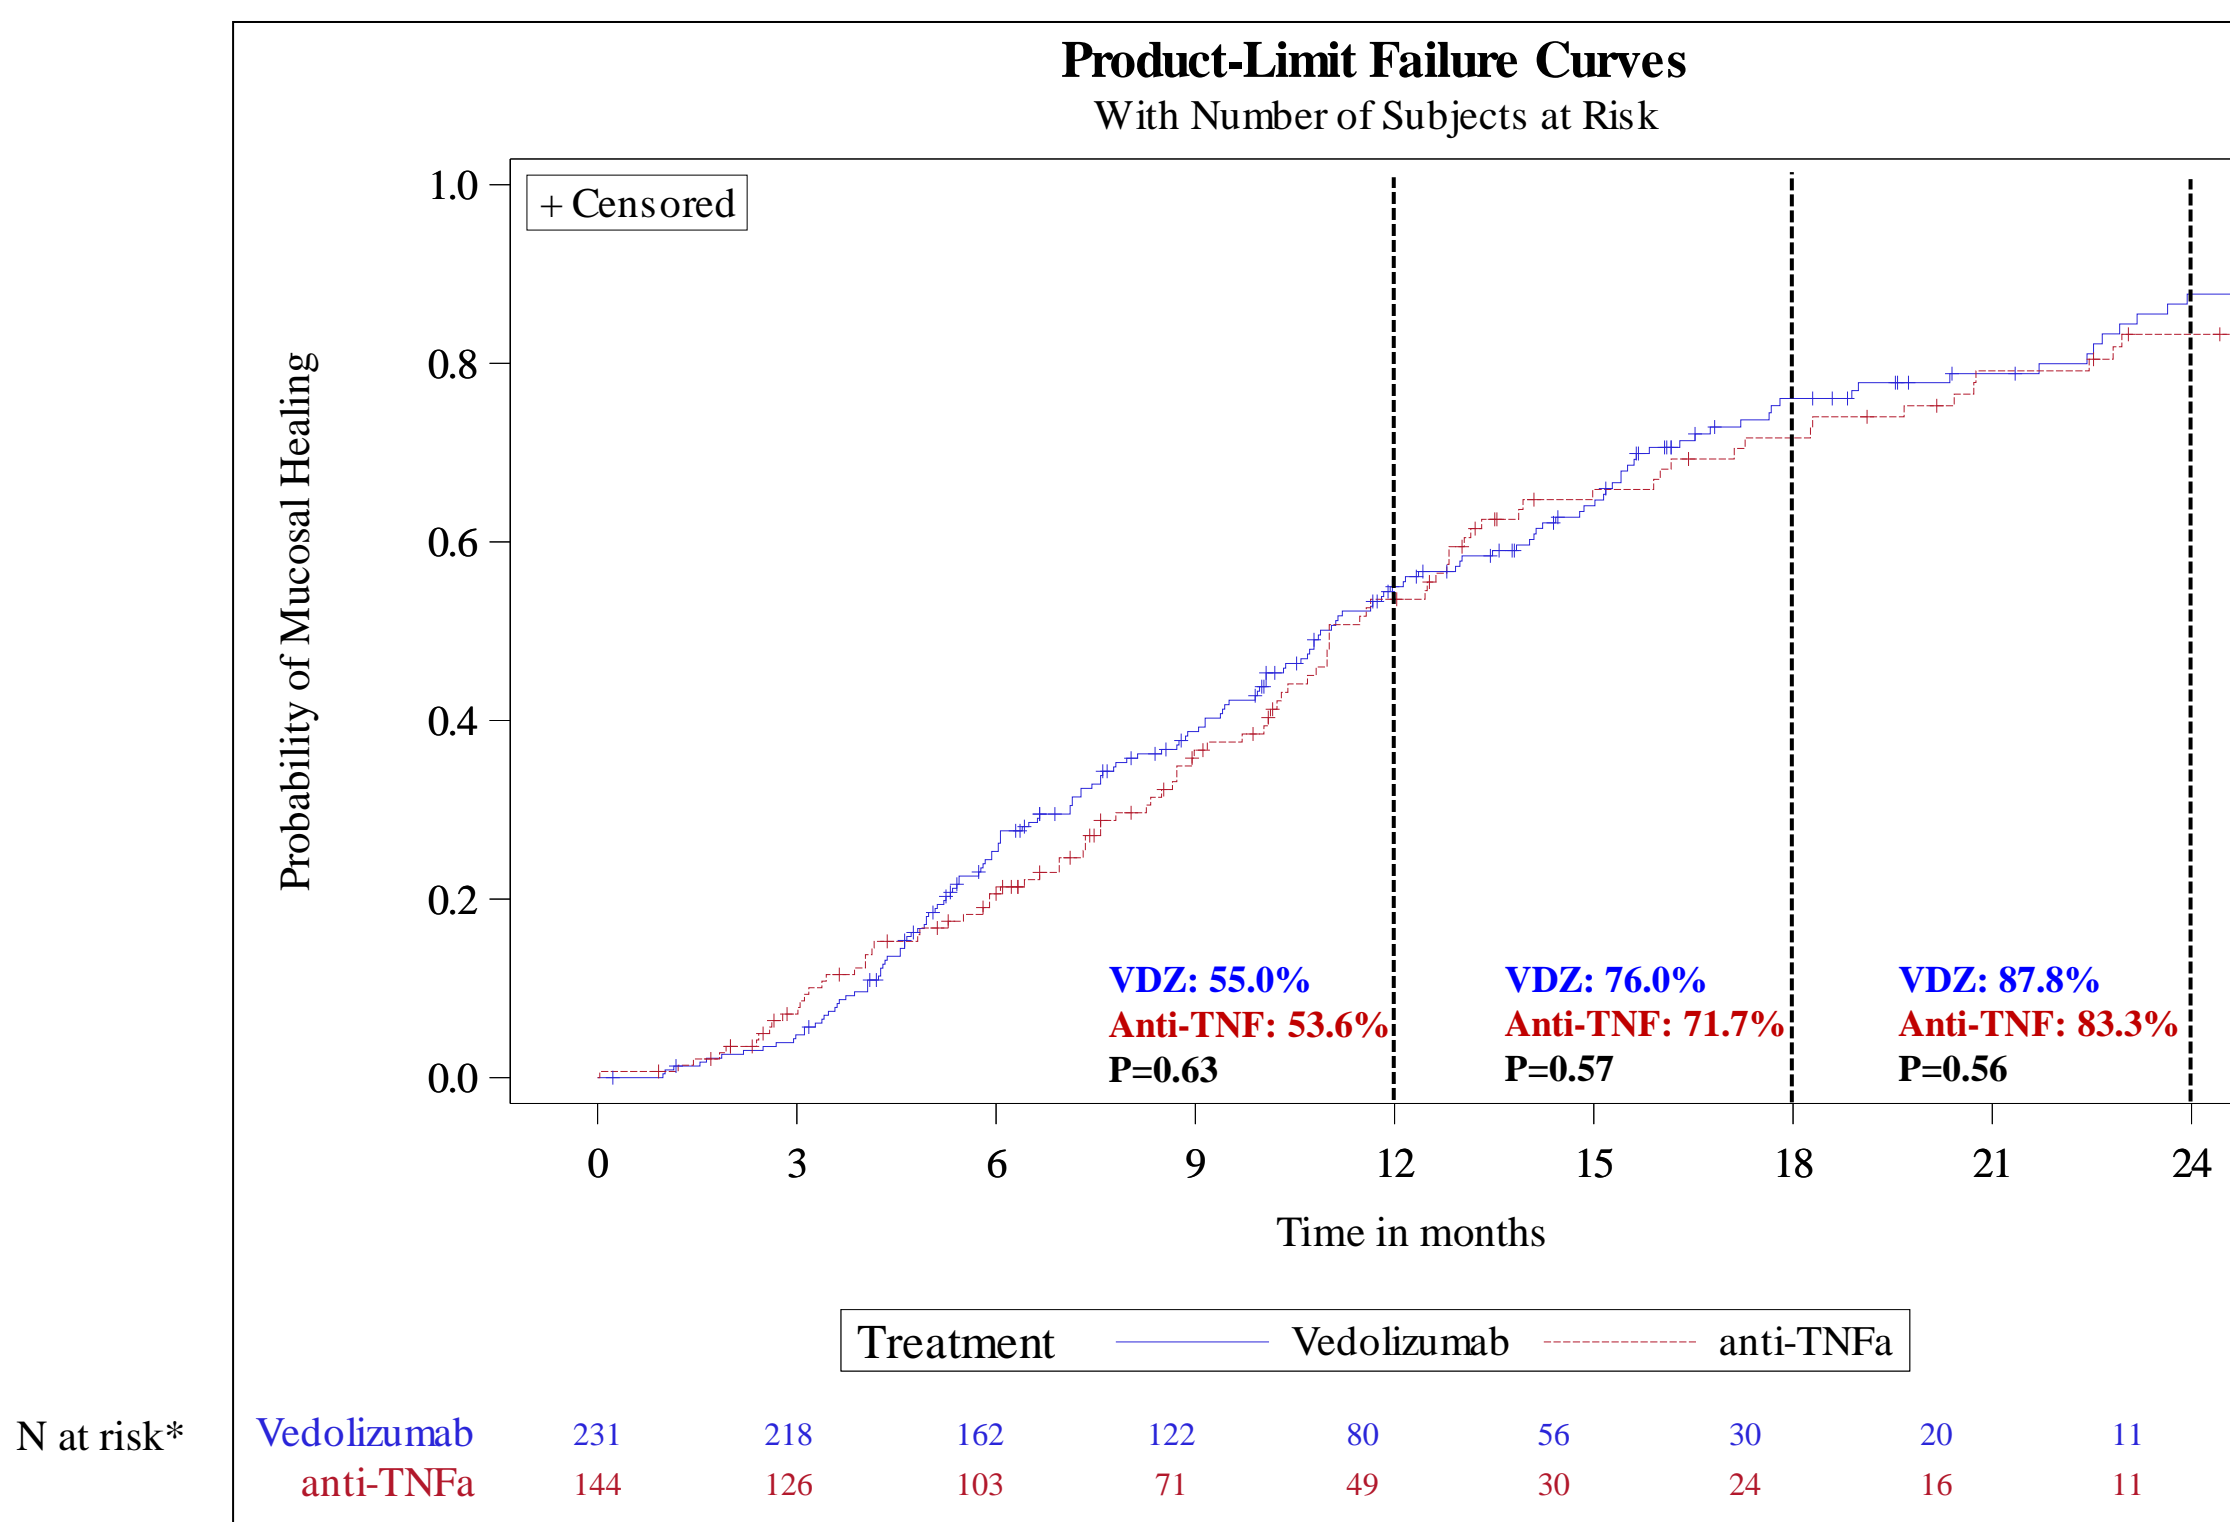

P-values are unadjusted log-rank. Annotated data are the rates at each time point as indicated by the dashed line.
